# Supplementary material for: Determining the effect of aging, recovery time, and post-stroke memantine treatment on delayed thalamic gliosis after cortical infarct
Source: PubMed Central journal article supplement (PMC8206333; doi:10.1038/s41598-021-91998-3), 2021-06-15

# Supplemental Figure 1.

## PSD 14 - Thalamus

Contra : **IBA-1** / **Lectin**

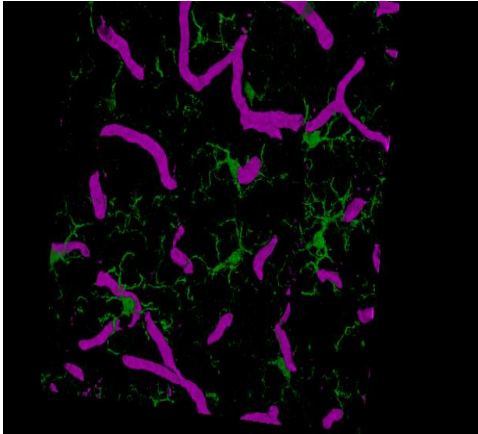

Ipsi : **IBA-1** / **Lectin**

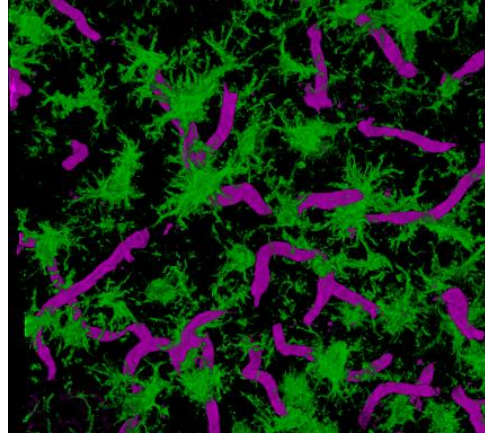

Contra: **GFAP** / **lectin**

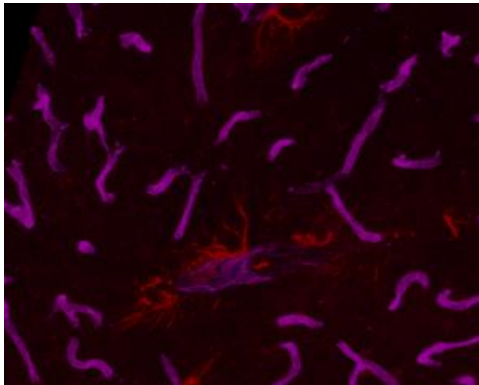

Ipsi: **GFAP** / **lectin**

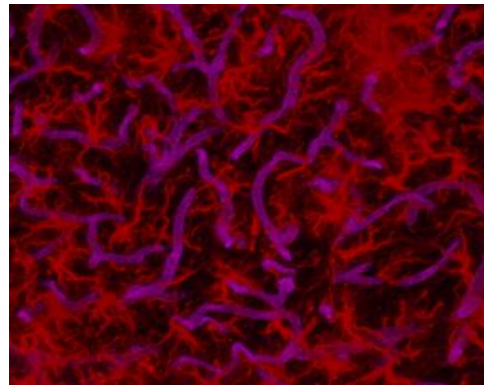

# Supplemental Figure 2.

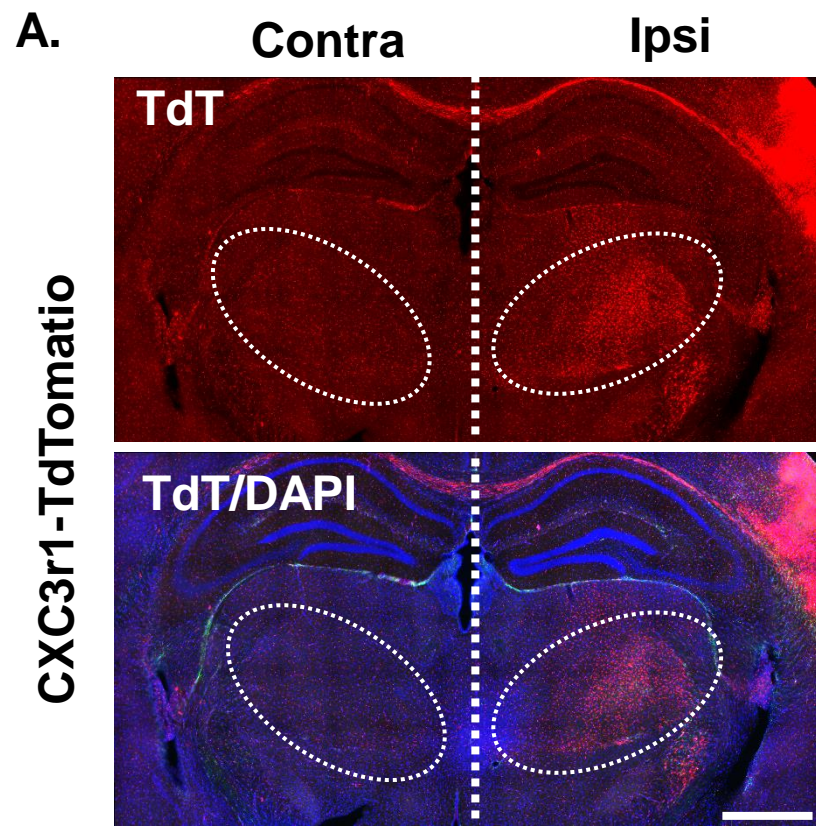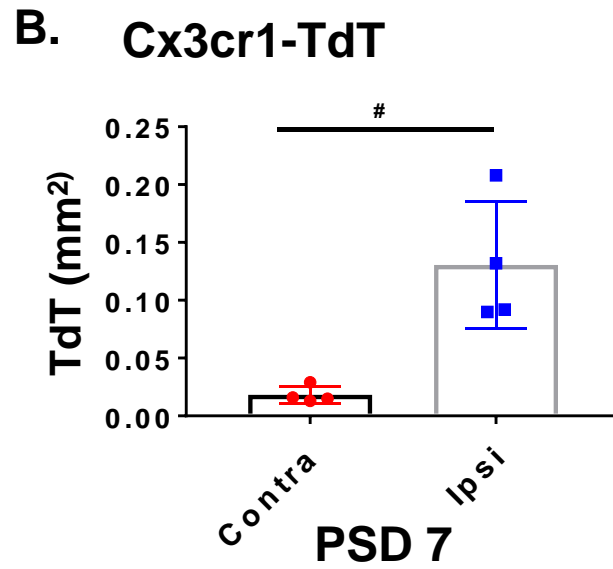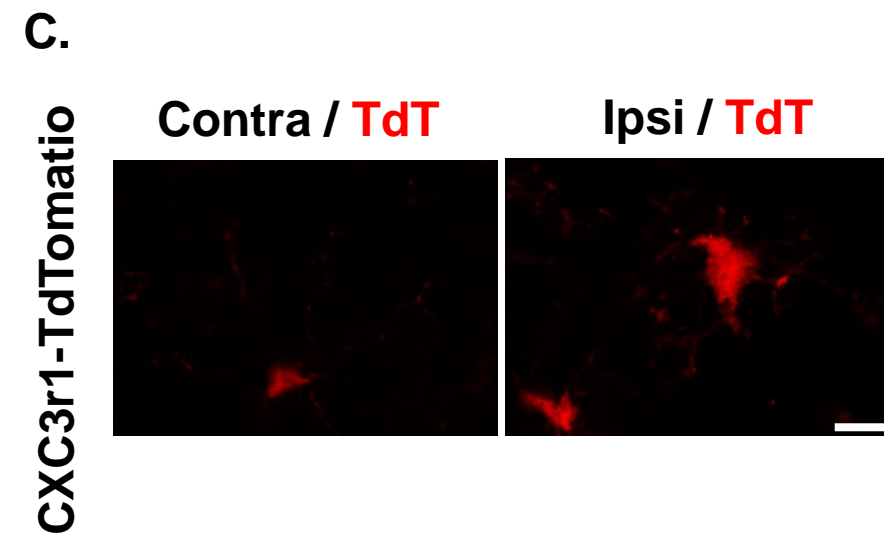

# Supplemental Figure 3.

## Cx3cr1-TdT (1 week stroke)

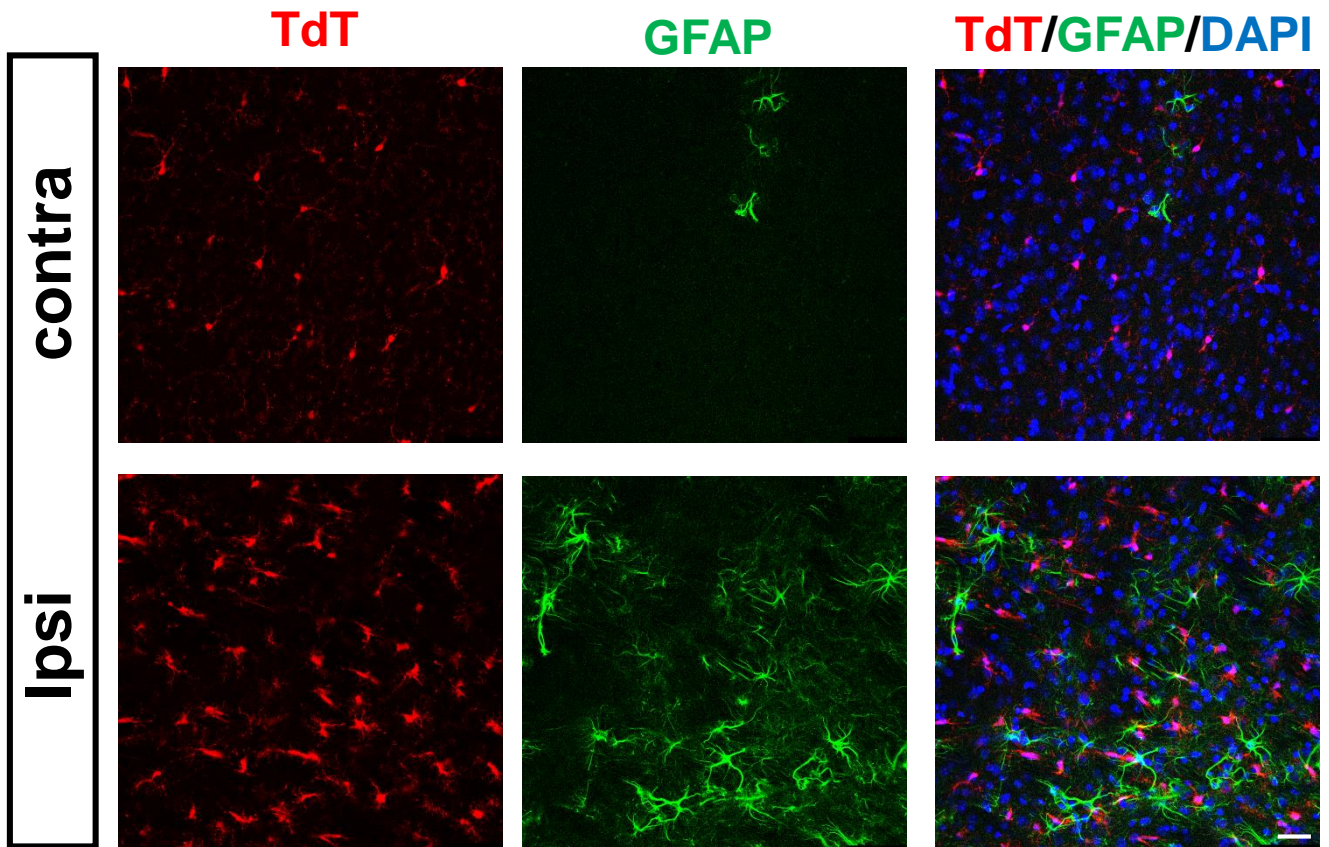



# Supplemental Figure 4.

**A. PSD 3**

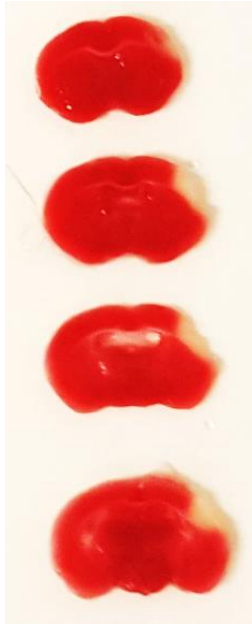

**B. PSD 14**

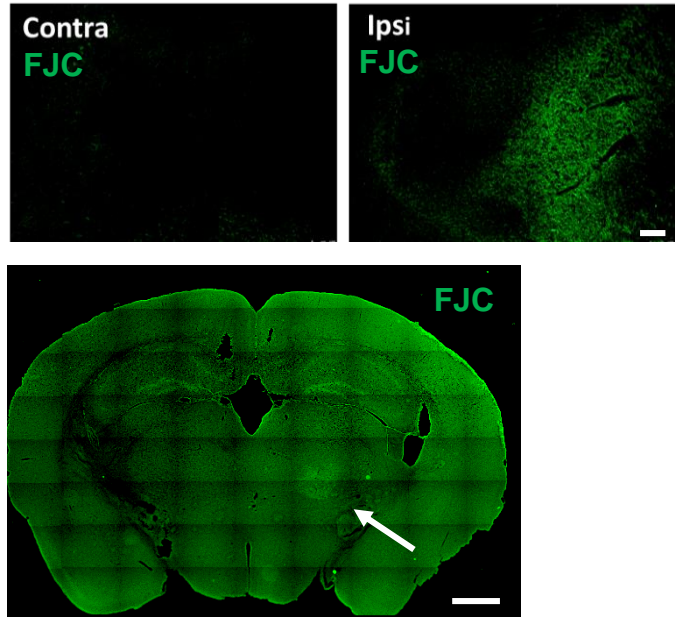

**C. -2 mm**

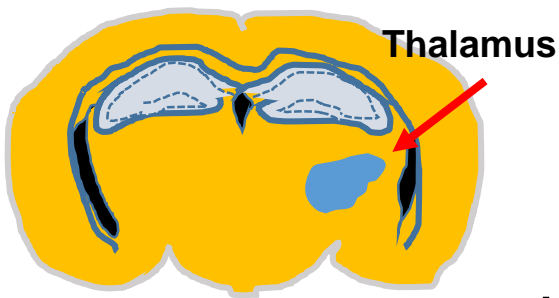

**D.**

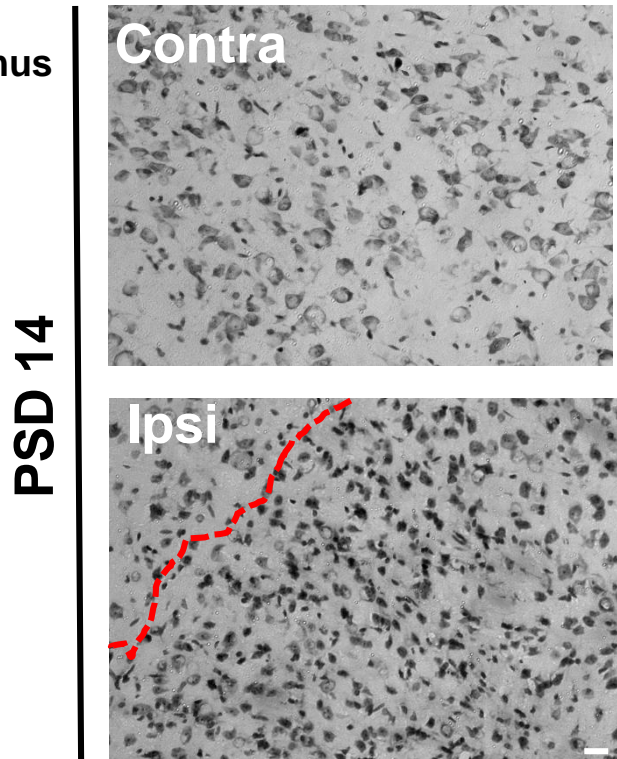

# Supplemental Figure 5.

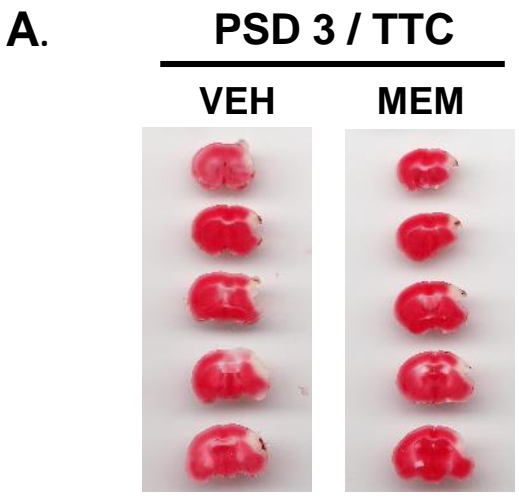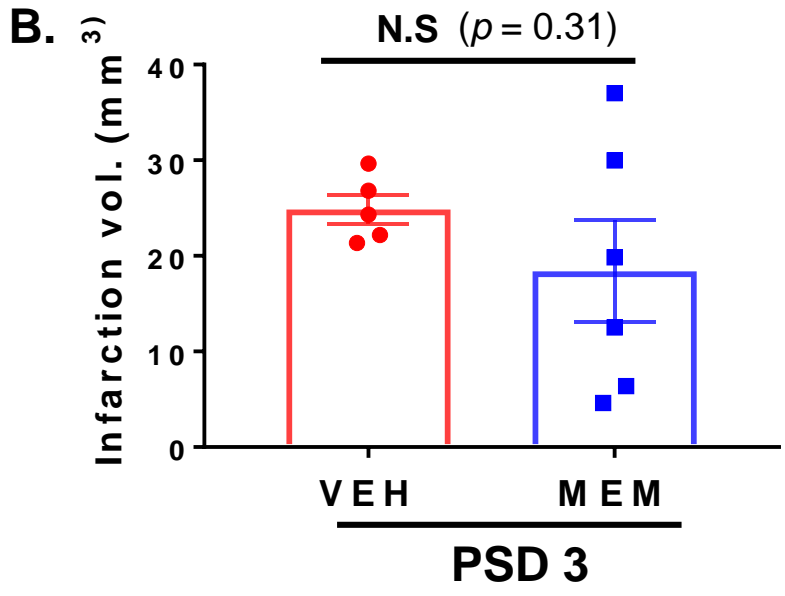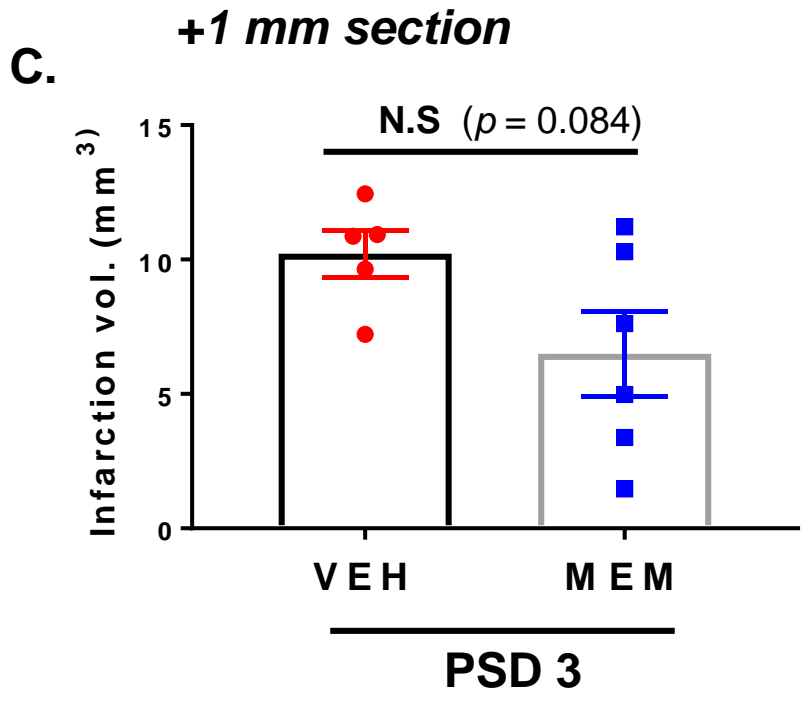

# Supplemental Figure 6.

A.

PSD 14

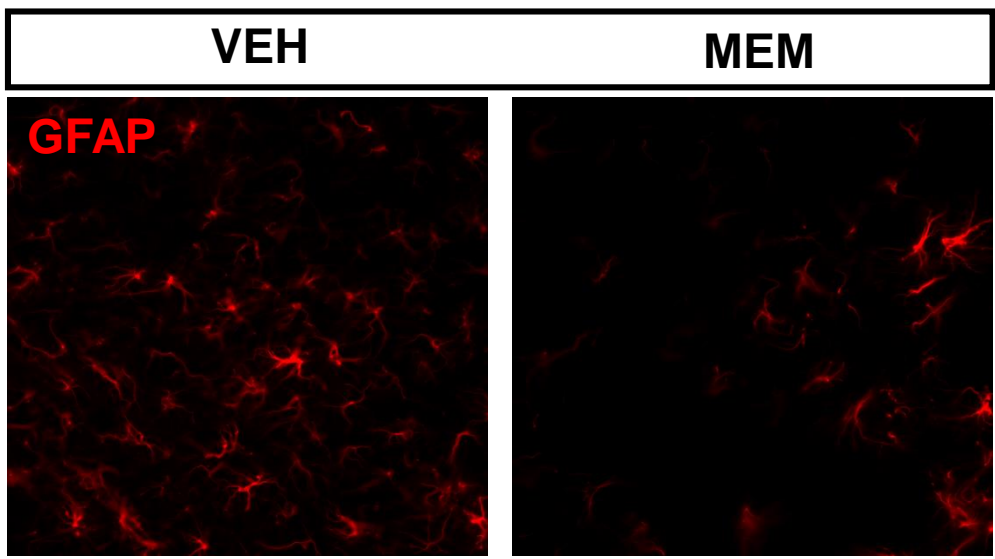

B.

PSD 14

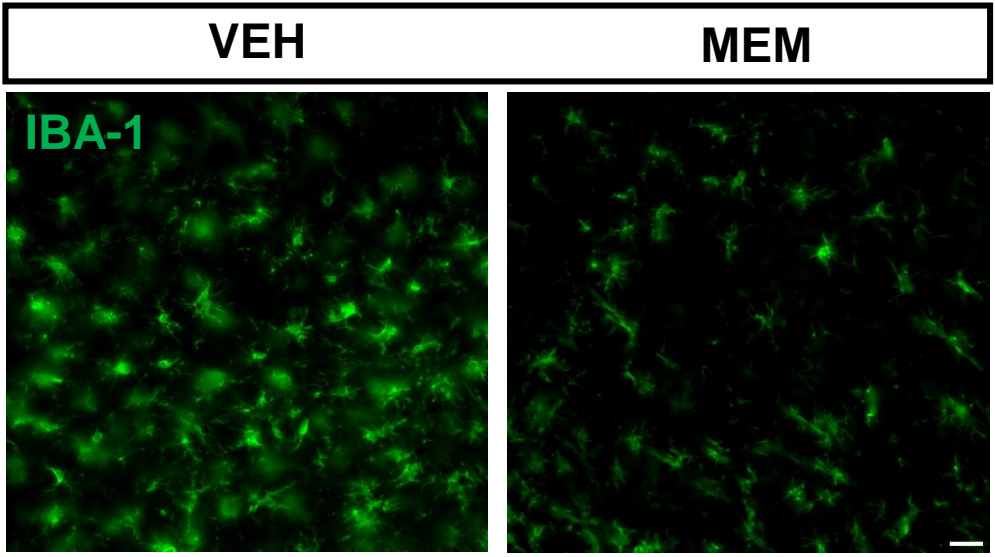

Supplement: 41598_2021_91998_MOESM1_ESM.pdf [file 41598_2021_91998_MOESM1_ESM.pdf]
